# Supplementary material
Source: Springer Nature journal article supplement (https://www.springermedizin.de/resource/supplementary/12970_2007_46_MOESM2_ESM.pdf/9594240)

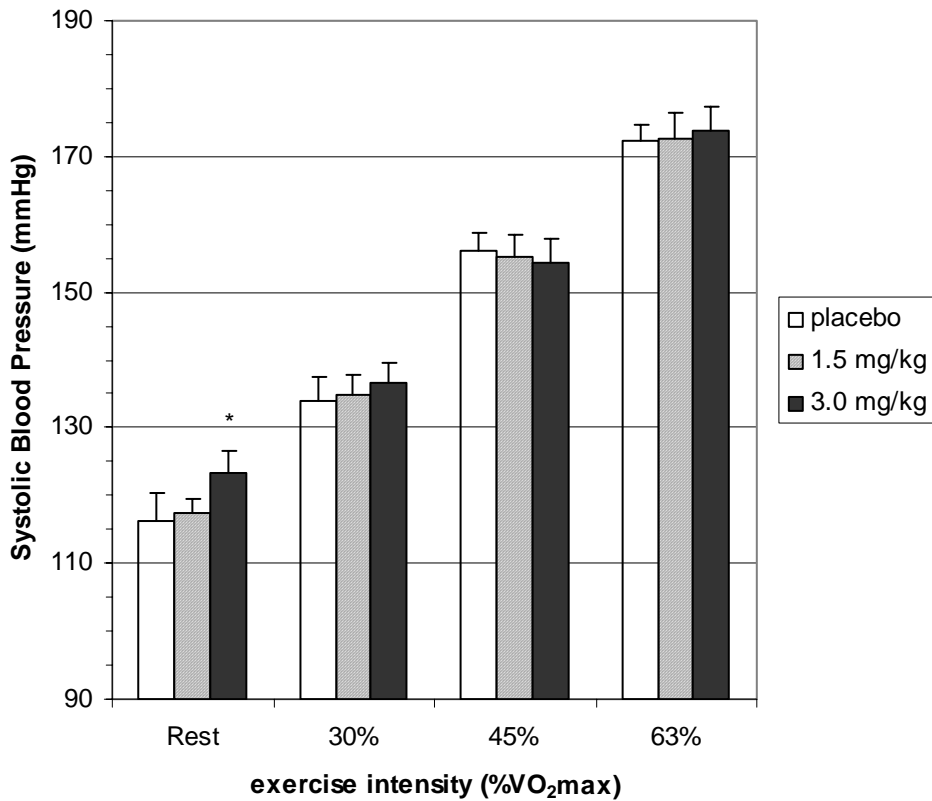

Supplement: MOESM2 [file 9594240]
